# Supplementary material
Source: PubMed Central journal article supplement (PMC3311280)
Supplement: supp_blood-2011-10-386995_TableS1.pdf [file supp_blood-2011-10-386995_TableS1.pdf]

| <b>Recipient</b> | <b>Cohort</b> | <b>Reactivated CMV</b> | <b>NK ligands</b> |
|------------------|---------------|------------------------|-------------------|
| 1                | Acute         | yes                    | C1                |
| 2                | Acute         | yes                    | C1 Bw4            |
| 3                | Acute         | yes                    | C1 Bw4            |
| 4                | Acute         | yes                    | C1 C2 B13         |
| 5                | Acute         | yes                    | C2                |
| 6                | Acute         | yes                    | C1 C2             |
| 7                | Acute         | yes                    | C1                |
| 8                | Acute         | yes                    | C1                |
| 9                | Acute         | yes                    | C1 C2 Bw4         |
| 10               | Acute         | yes                    | C2 Bw4            |
| 11               | Longitudinal  | no                     | C1 C2 Bw4         |
| 12               | Longitudinal  | no                     | C1 Bw4            |
| 13               | Longitudinal  | no                     | C1 Bw4            |
| 14               | Longitudinal  | no                     | C1 C2 Bw4         |
| 15               | Longitudinal  | no                     | C1 Bw4            |
| 16               | Longitudinal  | no                     | C1 C2 Bw4         |
| 17               | Longitudinal  | no                     | C1 C2 Bw4         |
| 18               | Longitudinal  | no                     | C1                |
| 19               | Longitudinal  | no                     | C2 Bw4            |
| 20               | Longitudinal  | no                     | C1 C2 Bw4         |
| 21               | Longitudinal  | no                     | C1 Bw4            |
| 22               | Longitudinal  | no                     | C2 Bw4            |
| 23               | Longitudinal  | no                     | C2 Bw4            |
| 24               | Longitudinal  | no                     | C2 Bw4            |
| 25               | Longitudinal  | no                     | C1                |
| 26               | Longitudinal  | yes                    | C1 C2 Bw4         |
| 27               | Longitudinal  | yes                    | C1 C2 Bw4         |
| 28               | Longitudinal  | yes                    | C1 C2 Bw4         |
| 29               | Longitudinal  | yes                    | C1 Bw4            |
| 30               | Longitudinal  | yes                    | C1 C2             |
| 31               | Longitudinal  | yes                    | C1 C2 Bw4         |
| 32               | Longitudinal  | yes                    | C2                |
| 33               | Longitudinal  | yes                    | C1 C2 Bw4         |
